# Supplementary material for: Efficient retention of mud drives land building on the Mississippi Delta plain
Source: Copernicus journal article supplement (doi:10.5194/esurf-2017-5), 2017-02-09
Supplement: Supplementary file 1 [file EspositoEA_SupplementalData.xlsx]

## Sheet: Table_Sd
THESE DATA APPEAR AS TABLE 1 IN THE MANUSCRIPT. THE VALUES HERE DEPEND ON CALCULATIONS IN THE Sd AND 'Sediment Samples' TABS.
	Sediment Texture Class	mean sand fraction	2σ error	max sand	min sand	n	texture fraction, channel	texture fraction, non-channel
	Very Fine Sand (vfS), and Sand Loam (SL)	0.239813	0.146285	0.315921	0.110573	23	0.169848	0.111918
	Silt Loam (SiL)	0.0454046	0.0396079	0.0661862	0.0252867	6	0.31816	0.233522
	Silty Clay Loam (SiCL)	0.00885223	0.0293681	0.0444572	0	10	0.403818	0.457627
	Silty Clay (SiC), and Clay (C)	0.0065927	0.0065927	0.0329635	0	14	0.108174	0.196933

## Sheet: Table_Si
	THESE DATA APPEAR AS TABLE 2 IN THE MANUSCRIPT. THE VALUES HERE DEPEND ON CALCULATIONS IN THE Si TAB.
	River Inputs	bin discharge range (m^3/s)	<15000 m^3/s	15000-20000 m^3/s	20000-25000 m^3/s	25000-30000 m^3/s	>30000 m^3/s
		average discharge in bin (m^3/s)	9657.93	17417	22448.6	27045.4	30959.4
		days spent at this bin Oct 1 1989 - Sept 30 2013	5116	1302	1559	673	116
		total water discharge during record (m^3)	4.26902e+12	1.95929e+12	3.02378e+12	1.57262e+12	3.10287e+11
		Total suspended sediment discharge during record (metric tons)	4.98386e+06	4.27875e+06	7.05892e+06	3.68598e+06	713454
		average sand suspended load, full channel (kg/s)	34.0643	453.283	964.707	1563.05	2167.83
		average mud suspended load, full channel (kg/s)	940.107	2833.01	3563.15	3913.89	3982.64
		sand fraction of total suspended load (-)	0.0349675	0.137931	0.213061	0.285388	0.352466
	Hydraulic Parameters	u* estimate (m/s)	0.06	0.06	0.06	0.09	0.09
		z_0 (m)	0.0005	0.0005	0.0005	0.0005	0.0005
	Top 5 m	average sand concentration per unit width, top 5 m (kg/m^2)	0	2.59901	5.53128	9.04726	12.5478
		average mud concentration per unit width, top 5 m (kg/m^2)	21.0156	63.3304	79.6523	58.3287	59.3532
		average sand fraction (S_i), top 5 m (-)	0	0.039421	0.0649337	0.13428	0.174516

## Sheet: Table_SRE
THESE CALCULATIONS ARE DISCUSSED IN SECTION 4.2.
THE VALUES HERE DEPEND ON CALCULATIONS IN THE Si and Sd TABS.
	Sediment Input Condition	Yearly averaged input sand fraction (Si)	SRE
	using modern sediment loads	0.0660438	1.45834
	assuming modern mud loads are reduced by 10% from paleo condition	0.0598346	1.32123
	20% reduction	0.0535422	1.18229
	30% reduction	0.0471651	1.04147
	40% reduction	0.0407015	0.898747
	50% reduction	0.0341496	0.754071

## Sheet: Si
Yellow Highlighted cells are visually assessed from the two graphs included in this sheet. These cells must be re-assessed if orther parameters are changed.
	INPUT RIVER CONDITIONS.
	bin	average sand load (metric tons/day)	mud load (metric tons/day)	sand fraction, total	depth (m)	fraction of average hydrograph at this discharge	fraction of mud load	fraction of sand load	u* (m/s) (from Nittrouer EA 2011 and RamirezEA 2013)	bed stress (Pa)
	<15000 m^3/s	2943.16	81225.3	0.0349675	30	0.583619	0.280457	0.048791	0.06	-
	15000-20000 m^3/s	39163.6	244772	0.137931	30	0.148528	0.215088	0.16523	0.06	3.6
	20000-25000 m^3/s	83350.7	307856	0.213061	30	0.177846	0.32392	0.421067	0.06	3.6
	25000-30000 m^3/s	135048	338160	0.285388	30	0.0767739	0.153597	0.294509	0.09	8.1
	>30000 m^3/s	187301	344100	0.352466	30	0.0132329	0.0269393	0.0704033	0.09	8.1
	SEDIMENT TRANSPORT PARAMETERS
	125 micron						250 micron											Physical Constants
	Boundary Reynolds Number R*, 125 micron	τ* - assessed from Shield's diagram	τ_crit, calculated from τ* from Shield's diagram	T*	transport layer thickness z_a (m)	Rouse number 150 µm	Boundary Reynolds Number R*, 250 micron	τ* - assessed from Shield's diagram	τ_crit, calculated from τ* from Shield's diagram	T* = tau_bed/tau_crit	transport layer thickness z_a (m)	Rouse number 250 µm		Parameters for calculating transport layer thickness				von Karman's constant	0.41		Grain Parameters
	-	-	-	-	-	-	-	-	-	-	-	-		z_a parameters				quartz density (kg/m^3)	2650		grain diameter (m)	relative concentration	Dietrich D*	Dietrich W* (estimated from Fig. 7, for CSF=.7)	fall velocity, from W* w_s (m/s)	stokes fall velocity, for comparison (m/s)
	7.5	0.031	0.0626588	57.4541	5.52562e-05	0.351551	15	0.031	0.125318	28.727	0.000128149	0.912713		A1	0.68			water density (kg/m^3)	1000		0.000125	0.35	31.582	0.04	0.00864815	0.0140365
	7.5	0.031	0.0626588	57.4541	5.52562e-05	0.351551	15	0.031	0.125318	28.727	0.000128149	0.912713		A2_250	1.29177			dynamic viscosity of water (Pa*s)	0.001		0.00015	0	54.5737	0.13	0.0128101	0.0202125
	11.25	0.031	0.0626588	129.272	5.56057e-05	0.234367	22.5	0.032	0.12936	62.616	0.000129995	0.608475		A2_125	1.52088			kinematic viscosity of water (m^2/s)	1e-06		0.00025	0.65	252.656	0.7	0.0224527	0.0561458
	11.25	0.031	0.0626588	129.272	5.56057e-05	0.234367	22.5	0.031	0.125318	64.6358	0.000130045	0.608475						acceleration of gravity (m/s^2)	9.8
	CONCENTRATION PROFILES FOR EACH SEDIMENT CLASS AND FLOW FLOW BIN
				C1 (kg/m^2)	21.0156						C1 (kg/m^2)	63.3304		C1 (kg/m^2)	6.50093				C1 (kg/m^2)	14.2561					C1 (kg/m^2)	79.6523					C1 (kg/m^2)	13.8357					C1 (kg/m^2)	30.3391							C1 (kg/m^2)	58.3287			C1 (kg/m^2)
	<15000 m^3/s			mud			15000-20000 m^3/s			mud			125 µm						250 µm						20000-25000 m^3/s			mud			125 µm						250 µm						30000-40000 cms			mud			125 µm
	Z	H-Z	U (m/s)	Concentration coeffient, k_i, such that c_i=k_i*c1. Mud is well mixed, so all k_i=1.	v_i*k_i (m/s)	channel width integrated concentration, c_i (kg/m^2)	Z	H-Z	U (m/s)	Concentration coeffient, k_i, such that c_i=k_i*c1. Mud is well mixed, so all k_i=1.	v_i*k_i	channel width integrated concentration, c_i (kg/m^2)	Rouse Equation Right Hand Side	relative concentration derived from Rouse equation r_i	average r_i n interval beginning at Z r_i	Concentration coeffient, k_i, such that c_i=k_i*c1	v_i*k_i	channel width integrated concentration, c_i (kg/m^2)	Rouse Equation Right Hand Side	relative concentration derived from Rouse equation r_i	average r_i n interval beginning at Z r_i	Concentration coeffient, k_i, such that c_i=k_i*c1	v_i*k_i	channel width integrated concentration, c_i (kg/m^2)	Z	H-Z	U (m/s)	Concentration coeffient, k_i, such that c_i=k_i*c1. Mud is well mixed, so all k_i=1.	v_i*k_i	channel width integrated concentration, c_i (kg/m^2)	Rouse Equation Right Hand Side	relative concentration derived from Rouse equation r_i	average r_i n interval beginning at Z r_i	Concentration coeffient, k_i, such that c_i=k_i*c1	v_i*k_i	channel width integrated concentration, c_i (kg/m^2)	Rouse Equation Right Hand Side	relative concentration derived from Rouse equation r_i	average r_i n interval beginning at Z r_i	Concentration coeffient, k_i, such that c_i=k_i*c1	v_i*k_i	channel width integrated concentration, c_i (kg/m^2)	Z	H-Z	U (m/s)	Concentration coeffient, k_i, such that c_i=k_i*c1. Mud is well mixed, so all k_i=1.	v_i*k_i	channel width integrated concentration, c_i (kg/m^2)	Rouse Equation Right Hand Side
	0.01	29.99	0.4384	1	0.4384	21.0156	0.01	29.99	0.4384	1	0.4384	63.3304	16.6853	0.943456	0.854541	1	0.4384	6.50093	1491.01	0.99933	0.977555	1	0.4384	14.2561	0.01	29.99	0.4384	1	0.4384	79.6523	16.6853	0.943456	0.854541	1	0.4384	13.8357	1491.01	0.99933	0.977555	1	0.4384	30.3391	0.01	29.99	0.6576	1	0.6576	58.3287	6.52964
	1	29	1.11233	1	1.11233	21.0156	1	29	1.11233	1	1.11233	63.3304	3.26669	0.765626	0.741124	0.867277	0.964696	5.63811	21.6147	0.955781	0.936635	0.95814	1.06576	13.6593	1	29	1.11233	1	1.11233	79.6523	3.26669	0.765626	0.741124	0.867277	0.964696	11.9994	21.6147	0.955781	0.936635	0.95814	1.06576	29.0691	1	29	1.66849	1	1.66849	58.3287	2.2016
	2	28	1.21376	1	1.21376	21.0156	2	28	1.21376	1	1.21376	63.3304	2.52885	0.716621	0.700334	0.819545	0.994733	5.3278	11.1195	0.917488	0.899427	0.920078	1.11676	13.1167	2	28	1.21376	1	1.21376	79.6523	2.52885	0.716621	0.700334	0.819545	0.994733	11.339	11.1195	0.917488	0.899427	0.920078	1.11676	27.9144	2	28	1.82065	1	1.82065	58.3287	1.85616
	3	27	1.2731	1	1.2731	21.0156	3	27	1.2731	1	1.2731	63.3304	2.16503	0.684048	0.671433	0.785724	1.0003	5.10794	7.42933	0.881367	0.863999	0.883836	1.12521	12.6	3	27	1.2731	1	1.2731	79.6523	2.16503	0.684048	0.671433	0.785724	1.0003	10.8711	7.42933	0.881367	0.863999	0.883836	1.12521	26.8148	3	27	1.90965	1	1.90965	58.3287	1.67357
	4	26	1.3152	1	1.3152	21.0156	4	26	1.3152	1	1.3152	63.3304	1.93099	0.658819	0.648306	0.75866	0.997789	4.932	5.52022	0.846631	0.829765	0.848816	1.11636	12.1008	4	26	1.3152	1	1.3152	79.6523	1.93099	0.658819	0.648306	0.75866	0.997789	10.4966	5.52022	0.846631	0.829765	0.848816	1.11636	25.7523	4	26	1.9728	1	1.9728	58.3287	1.55067
	5	25	1.34785	1	1.34785	21.0156	5	25	1.34785	1	1.34785	63.3304	1.76085	0.637793	0.628638	0.735644	0.991541	4.78237	4.34469	0.812898	0.796417	0.814702	1.0981	11.6145	5	25	1.34785	1	1.34785	79.6523	1.76085	0.637793	0.628638	0.735644	0.991541	10.1782	4.34469	0.812898	0.796417	0.814702	1.0981	24.7174	5	25	2.02178	1	2.02178	58.3287	1.4582
	6	24	1.37454	1	1.37454	21.0156	6	24	1.37454	1	1.37454	63.3304	1.628	0.619483	0.611267	0.715317	0.983229	4.65022	3.54411	0.779935	0.763758	0.781293	1.07392	11.1382	6	24	1.37454	1	1.37454	79.6523	1.628	0.619483	0.611267	0.715317	0.983229	9.89693	3.54411	0.779935	0.763758	0.781293	1.07392	23.7038	6	24	2.0618	1	2.0618	58.3287	1.38389
	7	23	1.39709	1	1.39709	21.0156	7	23	1.39709	1	1.39709	63.3304	1.51922	0.603052	0.595517	0.696885	0.973615	4.5304	2.96165	0.74758	0.731647	0.748446	1.04565	10.6699	7	23	1.39709	1	1.39709	79.6523	1.51922	0.603052	0.595517	0.696885	0.973615	9.64191	2.96165	0.74758	0.731647	0.748446	1.04565	22.7072	7	23	2.09564	1	2.09564	58.3287	1.32154
	8	22	1.41664	1	1.41664	21.0156	8	22	1.41664	1	1.41664	63.3304	1.42708	0.587982	0.580952	0.679841	0.963086	4.4196	2.51758	0.715714	0.699978	0.71605	1.01438	10.2081	8	22	1.41664	1	1.41664	79.6523	1.42708	0.587982	0.580952	0.679841	0.963086	9.40609	2.51758	0.715714	0.699978	0.71605	1.01438	21.7243	8	22	2.12495	1	2.12495	58.3287	1.26755
	9	21	1.43387	1	1.43387	21.0156	9	21	1.43387	1	1.43387	63.3304	1.34698	0.573921	0.56727	0.66383	0.951848	4.31552	2.16699	0.684243	0.668665	0.684018	0.980794	9.75141	9	21	1.43387	1	1.43387	79.6523	1.34698	0.573921	0.56727	0.66383	0.951848	9.18458	2.16699	0.684243	0.668665	0.684018	0.980794	20.7525	9	21	2.15081	1	2.15081	58.3287	1.21967
	10	20	1.44929	1	1.44929	21.0156	10	20	1.44929	1	1.44929	63.3304	1.27593	0.560619	0.554253	0.648598	0.940007	4.21649	1.88258	0.653088	0.637637	0.652277	0.945339	9.29891	10	20	1.44929	1	1.44929	79.6523	1.27593	0.560619	0.554253	0.648598	0.940007	8.97382	1.88258	0.653088	0.637637	0.652277	0.945339	19.7895	10	20	2.17394	1	2.17394	58.3287	1.17639
	11	19	1.46324	1	1.46324	21.0156	11	19	1.46324	1	1.46324	63.3304	1.21184	0.547887	0.541731	0.633944	0.927611	4.12123	1.6468	0.622186	0.606831	0.620764	0.908325	8.84965	11	19	1.46324	1	1.46324	79.6523	1.21184	0.547887	0.541731	0.633944	0.927611	8.77107	1.6468	0.622186	0.606831	0.620764	0.908325	18.8334	11	19	2.19486	1	2.19486	58.3287	1.13666
	12	18	1.47597	1	1.47597	21.0156	12	18	1.47597	1	1.47597	63.3304	1.1532	0.535575	0.529567	0.61971	0.914674	4.02869	1.44784	0.591476	0.576192	0.589421	0.869969	8.40283	12	18	1.47597	1	1.47597	79.6523	1.1532	0.535575	0.529567	0.61971	0.914674	8.57413	1.44784	0.591476	0.576192	0.589421	0.869969	17.8825	12	18	2.21396	1	2.21396	58.3287	1.09969
	13	17	1.48769	1	1.48769	21.0156	13	17	1.48769	1	1.48769	63.3304	1.0989	0.52356	0.517647	0.60576	0.90118	3.938	1.27742	0.560907	0.545669	0.558197	0.830422	7.9577	13	17	1.48769	1	1.48769	79.6523	1.0989	0.52356	0.517647	0.60576	0.90118	8.38112	1.27742	0.560907	0.545669	0.558197	0.830422	16.9352	13	17	2.23153	1	2.23153	58.3287	1.06489
	14	16	1.49853	1	1.49853	21.0156	14	16	1.49853	1	1.49853	63.3304	1.04806	0.511733	0.505867	0.591975	0.887092	3.84839	1.12961	0.53043	0.515215	0.527044	0.789792	7.51358	14	16	1.49853	1	1.49853	79.6523	1.04806	0.511733	0.505867	0.591975	0.887092	8.1904	1.12961	0.53043	0.515215	0.527044	0.789792	15.9901	14	16	2.2478	1	2.2478	58.3287	1.03179
	15	15	1.50863	1	1.50863	21.0156	15	15	1.50863	1	1.50863	63.3304	0.999999	0.5	0.494133	0.578244	0.872354	3.75912	0.999996	0.499999	0.484783	0.495914	0.748149	7.06978	15	15	1.50863	1	1.50863	79.6523	0.999999	0.5	0.494133	0.578244	0.872354	8.00042	0.999996	0.499999	0.484783	0.495914	0.748149	15.0456	15	15	2.26294	1	2.26294	58.3287	1
	16	14	1.51807	1	1.51807	21.0156	16	14	1.51807	1	1.51807	63.3304	0.954141	0.488266	0.482353	0.564459	0.856889	3.66951	0.885254	0.469568	0.454329	0.464761	0.70554	6.62566	16	14	1.51807	1	1.51807	79.6523	0.954141	0.488266	0.482353	0.564459	0.856889	7.8097	0.885254	0.469568	0.454329	0.464761	0.70554	14.1004	16	14	2.27711	1	2.27711	58.3287	0.969189
	17	13	1.52694	1	1.52694	21.0156	17	13	1.52694	1	1.52694	63.3304	0.910001	0.47644	0.470432	0.550509	0.840596	3.57882	0.78282	0.439091	0.423806	0.433537	0.661986	6.18053	17	13	1.52694	1	1.52694	79.6523	0.910001	0.47644	0.470432	0.550509	0.840596	7.61669	0.78282	0.439091	0.423806	0.433537	0.661986	13.1531	17	13	2.29042	1	2.29042	58.3287	0.939063
	18	12	1.53531	1	1.53531	21.0156	18	12	1.53531	1	1.53531	63.3304	0.867151	0.464425	0.458269	0.536274	0.823347	3.48628	0.69068	0.408522	0.393167	0.402194	0.617492	5.73371	18	12	1.53531	1	1.53531	79.6523	0.867151	0.464425	0.458269	0.536274	0.823347	7.41975	0.69068	0.408522	0.393167	0.402194	0.617492	12.2022	18	12	2.30296	1	2.30296	58.3287	0.909347
	19	11	1.54322	1	1.54322	21.0156	19	11	1.54322	1	1.54322	63.3304	0.825192	0.452112	0.445746	0.521621	0.804976	3.39102	0.607232	0.377812	0.362361	0.370681	0.572042	5.28445	19	11	1.54322	1	1.54322	79.6523	0.825192	0.452112	0.445746	0.521621	0.804976	7.217	0.607232	0.377812	0.362361	0.370681	0.572042	11.2461	19	11	2.31483	1	2.31483	58.3287	0.879772
	20	10	1.55073	1	1.55073	21.0156	20	10	1.55073	1	1.55073	63.3304	0.78374	0.43938	0.432729	0.506388	0.785269	3.29199	0.531181	0.346909	0.331332	0.33894	0.525603	4.83195	20	10	1.55073	1	1.55073	79.6523	0.78374	0.43938	0.432729	0.506388	0.785269	7.00624	0.531181	0.346909	0.331332	0.33894	0.525603	10.2831	20	10	2.32609	1	2.32609	58.3287	0.850057
	21	9	1.55787	1	1.55787	21.0156	21	9	1.55787	1	1.55787	63.3304	0.742398	0.426078	0.419048	0.490378	0.763943	3.18791	0.461465	0.315755	0.300019	0.306908	0.478121	4.3753	21	9	1.55787	1	1.55787	79.6523	0.742398	0.426078	0.419048	0.490378	0.763943	6.78473	0.461465	0.315755	0.300019	0.306908	0.478121	9.31132	21	9	2.3368	1	2.3368	58.3287	0.819894
	22	8	1.56467	1	1.56467	21.0156	22	8	1.56467	1	1.56467	63.3304	0.700731	0.412018	0.404482	0.473333	0.740612	3.0771	0.397201	0.284284	0.26835	0.274512	0.429522	3.91346	22	8	1.56467	1	1.56467	79.6523	0.700731	0.412018	0.404482	0.473333	0.740612	6.5489	0.397201	0.284284	0.26835	0.274512	0.429522	8.32845	22	8	2.34701	1	2.34701	58.3287	0.788922
	23	7	1.57118	1	1.57118	21.0156	23	7	1.57118	1	1.57118	63.3304	0.65823	0.396947	0.388732	0.454901	0.714732	2.95728	0.337645	0.252417	0.23624	0.241664	0.379697	3.44517	23	7	1.57118	1	1.57118	79.6523	0.65823	0.396947	0.388732	0.454901	0.714732	6.29389	0.337645	0.252417	0.23624	0.241664	0.379697	7.33187	23	7	2.35677	1	2.35677	58.3287	0.75669
	24	6	1.57741	1	1.57741	21.0156	24	6	1.57741	1	1.57741	63.3304	0.614249	0.380517	0.371361	0.434574	0.685501	2.82514	0.282153	0.220062	0.20358	0.208255	0.328502	2.96889	24	6	1.57741	1	1.57741	79.6523	0.614249	0.380517	0.371361	0.434574	0.685501	6.01265	0.282153	0.220062	0.20358	0.208255	0.328502	6.31826	24	6	2.36611	1	2.36611	58.3287	0.722597
	25	5	1.58338	1	1.58338	21.0156	25	5	1.58338	1	1.58338	63.3304	0.567904	0.362206	0.351693	0.411558	0.651654	2.67551	0.230161	0.187099	0.170232	0.174141	0.275731	2.48256	25	5	1.58338	1	1.58338	79.6523	0.567904	0.362206	0.351693	0.411558	0.651654	5.6942	0.230161	0.187099	0.170232	0.174141	0.275731	5.28328	25	5	2.37507	1	2.37507	58.3287	0.685778
	26	4	1.58912	1	1.58912	21.0156	26	4	1.58912	1	1.58912	63.3304	0.517866	0.34118	0.328566	0.384494	0.611008	2.49957	0.181148	0.153366	0.135998	0.13912	0.221079	1.98331	26	4	1.58912	1	1.58912	79.6523	0.517866	0.34118	0.328566	0.384494	0.611008	5.31975	0.181148	0.153366	0.135998	0.13912	0.221079	4.22079	26	4	2.38368	1	2.38368	58.3287	0.644879
	27	3	1.59464	1	1.59464	21.0156	27	3	1.59464	1	1.59464	63.3304	0.461884	0.315951	0.299664	0.350672	0.559198	2.2797	0.134597	0.11863	0.100569	0.102878	0.164053	1.46663	27	3	1.59464	1	1.59464	79.6523	0.461884	0.315951	0.299664	0.350672	0.559198	4.85181	0.134597	0.11863	0.100569	0.102878	0.164053	3.12122	27	3	2.39197	1	2.39197	58.3287	0.597524
	28	2	1.59997	1	1.59997	21.0156	28	2	1.59997	1	1.59997	63.3304	0.395434	0.283377	0.258874	0.302939	0.484692	1.96939	0.089927	0.0825074	0.0633608	0.0648156	0.103703	0.924015	28	2	1.59997	1	1.59997	79.6523	0.395434	0.283377	0.258874	0.302939	0.484692	4.19138	0.089927	0.0825074	0.0633608	0.0648156	0.103703	1.96645	28	2	2.39995	1	2.39995	58.3287	0.538744
	29	1	1.6051	1	1.6051	21.0156	29	1	1.6051	1	1.6051	63.3304	0.306115	0.234371	0.145405	0.170156	0.273118	1.10617	0.0462595	0.0442142	0.0224383	0.0229535	0.0368427	0.327226	29	1	1.6051	1	1.6051	79.6523	0.306115	0.234371	0.145405	0.170156	0.273118	2.35423	0.0462595	0.0442142	0.0224383	0.0229535	0.0368427	0.696389	29	1	2.40765	1	2.40765	58.3287	0.45421
	29.99	0.01	1.61001	1	1.61001	21.0156	29.99	0.01	1.61001	1	1.61001	63.3304	0.0598164	0.0564403	0.0564403	0.0660475	0.106337	0.42937	0.000662838	0.000662399	0.000662399	0.000677608	0.00109096	0.00966002	29.99	0.01	1.61001	1	1.61001	79.6523	0.0598164	0.0564403	0.0564403	0.0660475	0.106337	0.913815	0.000662838	0.000662399	0.000662399	0.000677608	0.00109096	0.020558	29.99	0.01	2.41502	1	2.41502	58.3287	0.152948
	average concentration of 125 µm sand carried in top 5 m, per unit width (kg/m^2)	0					average concentration of 125 µm sand carried in top 5 m, per unit width (kg/m^2)	1.65684																	average concentration of 125 µm sand carried in top 5 m, per unit width (kg/m^2)	3.5262																	average concentration of 125 µm sand carried in top 5 m, per unit width (kg/m^2)	4.9282
	average concentration of 250 µm sand carried in top 5 m, per unit width (kg/m^2)	0					average concentration of 250 µm sand carried in top 5 m, per unit width (kg/m^2)	0.942168																	average concentration of 250 µm sand carried in top 5 m, per unit width (kg/m^2)	2.00508																	average concentration of 250 µm sand carried in top 5 m, per unit width (kg/m^2)	4.11906
	average sand concentration in top 5 m, per unit width (kg/m^2)	0					average sand concentration in top 5 m, per unit width (kg/m^2)	2.59901																	average sand concentration in top 5 m, per unit width (kg/m^2)	5.53128																	average sand concentration in top 5 m, per unit width (kg/m^2)	9.04726
	average mud concentration in top 5 m, per unit width (kg/m^2)	21.0156					average mud concentration in top 5 m, per unit width (kg/m^2)	63.3304																	average mud concentration in top 5 m, per unit width (kg/m^2)	79.6523																	average mud concentration in top 5 m, per unit width (kg/m^2)	58.3287
	TABLE - river conditions
River Inputs	bin discharge range (m^3/s)	<15000 m^3/s	15000-20000 m^3/s	20000-25000 m^3/s	25000-30000 m^3/s	>30000 m^3/s
	average discharge in bin (m^3/s)	9657.93	17417	22448.6	27045.4	30959.4
	days spent at this bin Oct 1 1989 - Sept 30 2013	5116	1302	1559	673	116
	total water discharge during record (m^3)	4.26902e+12	1.95929e+12	3.02378e+12	1.57262e+12	3.10287e+11
	Total suspended sediment discharge during record (metric tons)	4.98386e+06	4.27875e+06	7.05892e+06	3.68598e+06	713454			INPUT SAND FRACTION (S_i) FOR A 5 METER CREVASSE
	average sand suspended load, full channel (kg/s)	34.0643	453.283	964.707	1563.05	2167.83		0.0660438	yearly averaged sand fraction, modern loads	0.0660438
	average mud suspended load, full channel (kg/s)	940.107	2833.01	3563.15	3913.89	3982.64			yearly averaged sand fraction, paleo, assuming modern loads represent 10% mud decrease	0.0598346
	sand fraction of total suspended load (-)	0.0349675	0.137931	0.213061	0.285388	0.352466			yearly averaged sand fraction, paleo, assuming modern loads represent 20% mud decrease	0.0535422
Hydraulic Parameters	u* estimate (m/s)	0.06	0.06	0.06	0.09	0.09			yearly averaged sand fraction, paleo, assuming modern loads represent 30% mud decrease	0.0471651
	z_0 (m)	0.0005	0.0005	0.0005	0.0005	0.0005			yearly averaged sand fraction, paleo, assuming modern loads represent 40% mud decrease	0.0407015
Calculated Sand Fraction, top 5 m	average sand concentration per unit width, top 5 m (kg/m^2)	0	2.59901	5.53128	9.04726	12.5478			yearly averaged sand fraction, paleo, assuming modern loads represent 50% mud decrease	0.0341496
	average mud concentration per unit width, top 5 m (kg/m^2)	21.0156	63.3304	79.6523	58.3287	59.3532
	average sand fraction (S_i), top 5 m (-)	0	0.039421	0.0649337	0.13428	0.174516
	sand fraction, 5m, 10% reduction	0	0.0356194	0.0588222	0.122497	0.159854	0.1
	sand fraction, 5m, 20%, reduction	0	0.0317875	0.0526304	0.110389	0.144662	0.2
	sand fraction, 5m, 30% reduction	0	0.027925	0.0463566	0.0979418	0.12891	0.3
	sand fraction, 5m, 40% reduction	0	0.0240316	0.0399991	0.0851413	0.112567	0.4
	sand fraction, 5m, 50% reduction	0	0.0201068	0.0335563	0.0719724	0.0955996	0.5
	concentration*discharge*time, sand	0	5.89376e+07	1.93581e+08	1.64674e+08	4.50629e+07
	concentration*discharge*time, mud	1.03838e+09	1.43614e+09	2.78763e+09	1.06167e+09	2.13154e+08
[truncated: 29 more columns]

## Sheet: Sd
	TABLE 1: sand fraction of texture classifications
		mean sand	2σ	sample variance
	vfs	23.9813	14.6285	53.4981
	SL	15.4112	18.8029	88.3873
	SiL	4.54046	3.96079	3.92196
	SiCL	0.885223	2.93681	2.15621
	SiC	0.65927	2.94834	2.17318
	C	0.503048	1.90695	0.909116
	TABLE 2: sand fraction of splay elements
		fraction	N
	CHANNELS ONLY		2043	variance from fraction	variance partition
	vfs, fs	0.0592266	121
	SL	0.110622	226	0.654664	0.462164	0.169848
	SiL	0.31816	650	0.397003	0.280266
	SiCL	0.403818	825	0.351611	0.248222
	SiC	0.0651003	133	0.00921007	0.0065019
	C	0.0430739	88	0.00403204	0.00284644
	TOTAL	1
	-2σ	3.55947
	mean sand percent in channels	5.93982	variance sand percent in channels	1.41652	1
	+2σ	8.32018	StDev sand percent outside of channels	1.19018
	SPLAY TOTAL		5760
	vfs, fs	0.0475694	274
	SL	0.0848958	489			0.132465
	SiL	0.263542	1518
	SiCL	0.438542	2526
	SiC	0.102257	589
	C	0.0631944	364
	TOTAL	1
	-2σ	4.8607
	mean sand percent in channels	4.8607	variance sand percent in channels
	+2σ	4.8607	StDev sand percent outside of channels
	SPLAY W/O CHANNELS		3717	variance from fraction	variance partition
	vfs, fs	0.0411622	153
	SL	0.070756	263	0.267833	0.273871	0.111918
	SiL	0.233522	868	0.213874	0.218695
	SiCL	0.457627	1701	0.45156	0.461738
	SiC	0.12268	456	0.032707	0.0334443
	C	0.0742534	276	0.011982	0.0122521
	TOTAL	1
	-2σ	2.28974
	mean sand percent	4.26757	variance sand percent outside channels	0.977956	1
	+2σ	6.2454	StDev sand percent outside of channels	0.988917
	TABLE 3: sand fraction of total splay
		Volume (m^3)
	Channels (m^3)	25236276	0.156151		total
	Splay W/O Channels (m^3)	136378488	0.843849		161614764
	Variance of sand percent in total splay	0.730924
	StDev of sand percent in total splay	0.854941	1.70988
		-2σ	mean	+2σ
	Sand percent in total splay	2.81881	4.52869	6.23857

## Sheet: Sediment Samples
Sample Depth	Borehole	% sand (>63 µm)	% silt (2-63 µm)	% clay (< 2 µm)	count			sand%
vfs							vfs,SL combined			bins		Bin	Frequency
250-260	010	26.3962	61.0174	12.5865	1		Average	18.3921		0		0	0
260-270	010	31.5921	59.2294	9.17853	1		StDev	9.52296		5		5	0
270-280	010	31.1273	59.798	9.0747	1		Variance (sample)	90.6867		10		10	0
280-290	010	22.5158	65.3428	12.1414	1		STErr			15		15	1
290-300	010	16.556	71.7946	11.6494	1		Median	16.7299		20		20	1
330-340	010	11.0573	77.8855	11.0573	1					25		25	2
170-180	059	29.808	70.5654	0.132817	1					30		30	2
180-190	059	22.7975	72.562	4.64028	1					35		35	2
Average		23.9813	67.2744	8.80761						40		40	0
STDev		7.31424	6.92115	4.33192						45		45	0
Variance (sample)		53.4981	47.9024	18.7655						50		50	0
STErr		2.58597	2.447	1.53156								More	0
Median		24.5968	67.9541	10.1179
Sample Depth	Borehole	% sand (>63 µm)	% silt (2-63 µm)	% clay (< 2 µm)
SL
80-90	010	4.56803	81.007	14.425	1
100-110	010	9.05966	76.9458	13.9946	1							Bin	Frequency
110-120	010	7.53914	80.4228	12.0381	1							0	0
120-130	010	8.54605	79.8254	11.6285	1							5	1
140-150	010	9.05931	83.3541	7.58658	1							10	5
160-170	010	17.1883	72.5452	10.2664	1							15	3
170-180	010	14.5858	75.3314	10.0828	1							20	4
180-190	010	14.5732	74.4761	10.9507	1							25	0
190-200	010	16.7299	70.8329	12.4372	1							30	0
220-230	010	18.3504	67.7348	13.9148	1							35	1
230-240	010	39.0618	56.0896	4.84858	1							40	1
240-250	010	31.8462	59.2602	8.89367	1							45	0
40-50	010	7.8029	78.0332	14.1639	1							50	0
470-480	010	12.4702	69.5471	19.951	1							More	0
430-440	010	19.7868	62.7848	17.4283	1
Average		15.4112	72.546	12.174
STDev		9.40145	8.20309	3.76849
Variance (sample)		88.3873	67.2907	14.2015
STErr		2.42744	2.11803	0.97302
Median		14.5732	74.4761	12.0381
Sample Depth	Borehole	% sand (>63 µm)	% silt (2-63 µm)	% clay (< 2 µm)								Bin	Frequency
SiL												0	0
10-20	010	6.61862	79.6177	13.7637	1							5	3
20-30	010	6.16033	78.9426	14.8971	1							10	3
30-40	010	2.53552	80.1977	17.2667	1							15	0
50-60	010	6.20799	81.4007	12.3914	1							20	0
60-70	010	2.52867	81.924	15.5473	1							25	0
130-140	010	3.19162	83.0141	13.7943	1							30	0
												35	0
												40	0
Average		4.54046	80.8495	14.6101								45	0
STDev		1.98039	1.53116	1.69252								50	0
Variance (sample)		3.92196	2.34445	2.86463								More	0
STErr		0.808493	0.625094	0.69097
Median		4.67598	80.7992	14.3457
Sample Depth	Borehole	% sand (>63 µm)	% silt (2-63 µm)	% clay (< 2 µm)
SiCL
110-120	032	0	69.8838	30.1155	1
460-470	010	2.494	77.556	19	1
420-430	010	4.44572	72.2588	23.2954	1
510-520	010	0.788906	69.5349	29.6762	1
580-590	010	0.0543186	68.0881	31.8576	1
1330-1340	010	0.762894	63.5658	35.6713	1
290-300	032	0	60.0212	39.9778	1
310-320	032	0.112078	71.1099	28.7787	1
300-310	032	0.194311	67.3386	32.4667	1
320-330	032	0	75.7946	24.2047	1
Average		0.885223	69.5152	29.5044
STDev		1.46841	5.23448	6.14586
Variance (sample)		2.15621	27.3998	37.7716
STErr		0.464351	1.65529	1.94349
Median		0.153195	69.7094	29.8958
Sample Depth	Borehole	% sand (>63 µm)	% silt (2-63 µm)	% clay (< 2 µm)
SiC
770-780	010	3.29635	55.0942	41.6094	1
80-90	032	0	77.1064	22.895	1
100-110	032	0	71.6315	28.3695	1
120-130	032	0	73.8684	26.132	1
130-140	032	0	75.6729	24.3278	1
Average		0.65927	70.6747	28.6667
STDev		1.47417	8.94728	7.51941
Variance (sample)		2.17318	80.0538	56.5415
STErr		0.65927	4.00135	3.36278
Median		0	73.8684	26.132
Sample Depth	Borehole	% sand (>63 µm)	% silt (2-63 µm)	% clay (< 2 µm)
C
650-660	010	0.812517	39.167	60.0205	1
680-690	010	0.859964	58.5842	40.5559	1
730-740	010	2.85495	54.5863	42.5588	1
70-80	032	0	69.4868	30.5132	1
140-150	032	0	72.1153	27.8847	1
180-190	032	0	66.6769	33.3231	1
200-210	032	0	65.4104	34.5896	1
210-220	032	0	49.0837	50.9163	1
190-200	032	0	69.5034	30.4973	1
Average		0.503048	60.5127	38.9844
STDev		0.953476	11.0853	10.715
Variance (sample)		0.909116	122.884	114.812
STErr		0.317825	3.69511	3.57167
Median		0	65.4104	34.5896
					53

## Sheet: Si, Sensitivity
RESULTS OF SENSITIVITY TESTS ON Si
test scenario	yearly averaged sand fraction (Si) for 5 m crevasse, modern loads
BASE CASE	0.0484
bin 2 u*=0.05	0.047
bin 2 u*=0.04	0.0414
bin 2 u*=0.07	0.0497
bin 2 u*=0.08	0.0508
bin 3 u*=0.05	0.0449
bin 3 u*=0.04	0.0412
bin 3 u*=0.07	0.0515
bin 3 u*=0.08	0.0542
bin 4 u*=0.08	0.0467
bin 4 u*=0.07	0.0448
bin 4 u*=0.10	0.0499
bin 4 u*=0.11	0.0512
bin 4 u*=0.12	0.0523
bin 4 u*=0.13	0.0533
bin 4 u*=0.14	0.0543
bin 5 u*=0.08	0.048
bin 5 u*=0.07	0.0475
bin 5 u*=0.10	0.0488
bin 5 u*=0.11	0.0491
bin 5 u*=0.12	0.0493
bin 5 u*=0.13	0.0496
bin 5 u*=0.14	0.0498
125 to 250 micron sand ratio = 25/75	0.0437
125 to 250 micron sand ratio = 50/50	0.0553
average concentration in top 4 m	0.0413
average concentration in top 3 m	0.0326
average concentration in top 6 m	0.0545
average concentration in top 7 m	0.0599
average concentration in top 10 m	0.0736

## Sheet: Sd, Sensitivity
RESULTS OF SENSITIVITY TESTING ON Sd
test scenario	Sand Fraction in splay (Sd)
channel, non channel volumes ==> 0.1562, 0.8438 (base case)	0.04529
channel, non channel volumes ==> 0.1250, 0.8750	0.04477
channel, non channel volumes ==> 0.1000, 0.9000	0.04435
channel, non channel volumes ==> 0.1750, 0.8250	0.04574
channel, non channel volumes ==> 0.2000, 0.8000	0.04602
channel, non channel volumes ==> 0.3000, 0.7000	0.04769
channel, non channel volumes ==> 0.4000, 0.8000	0.04825
